# Supplementary material for: Sirtuin 5‐mediated deacetylation of TAZ at K54 promotes melanoma development and lung metastasis
Source: Research Square preprint supplement (doi:10.21203/rs.3.rs-2527464/v1), 2023-01-31
Supplement: Supplementary file 1 [file 0a786d0195050ae26f39be0a.docx]

Supplementary Materials for

Sirtuin 5‐mediated deacetylation of TAZ at K54 promotes melanoma development and lung metastasis

Garam Kim, Poshan Yugal Bhattarai, Sung-Chul Lim, Kwang Youl Lee, andHong Seok Choi

Correspondence to: chs@chosun.ac.kr

**This PDF file includes:**

Figures S1 to S3

**
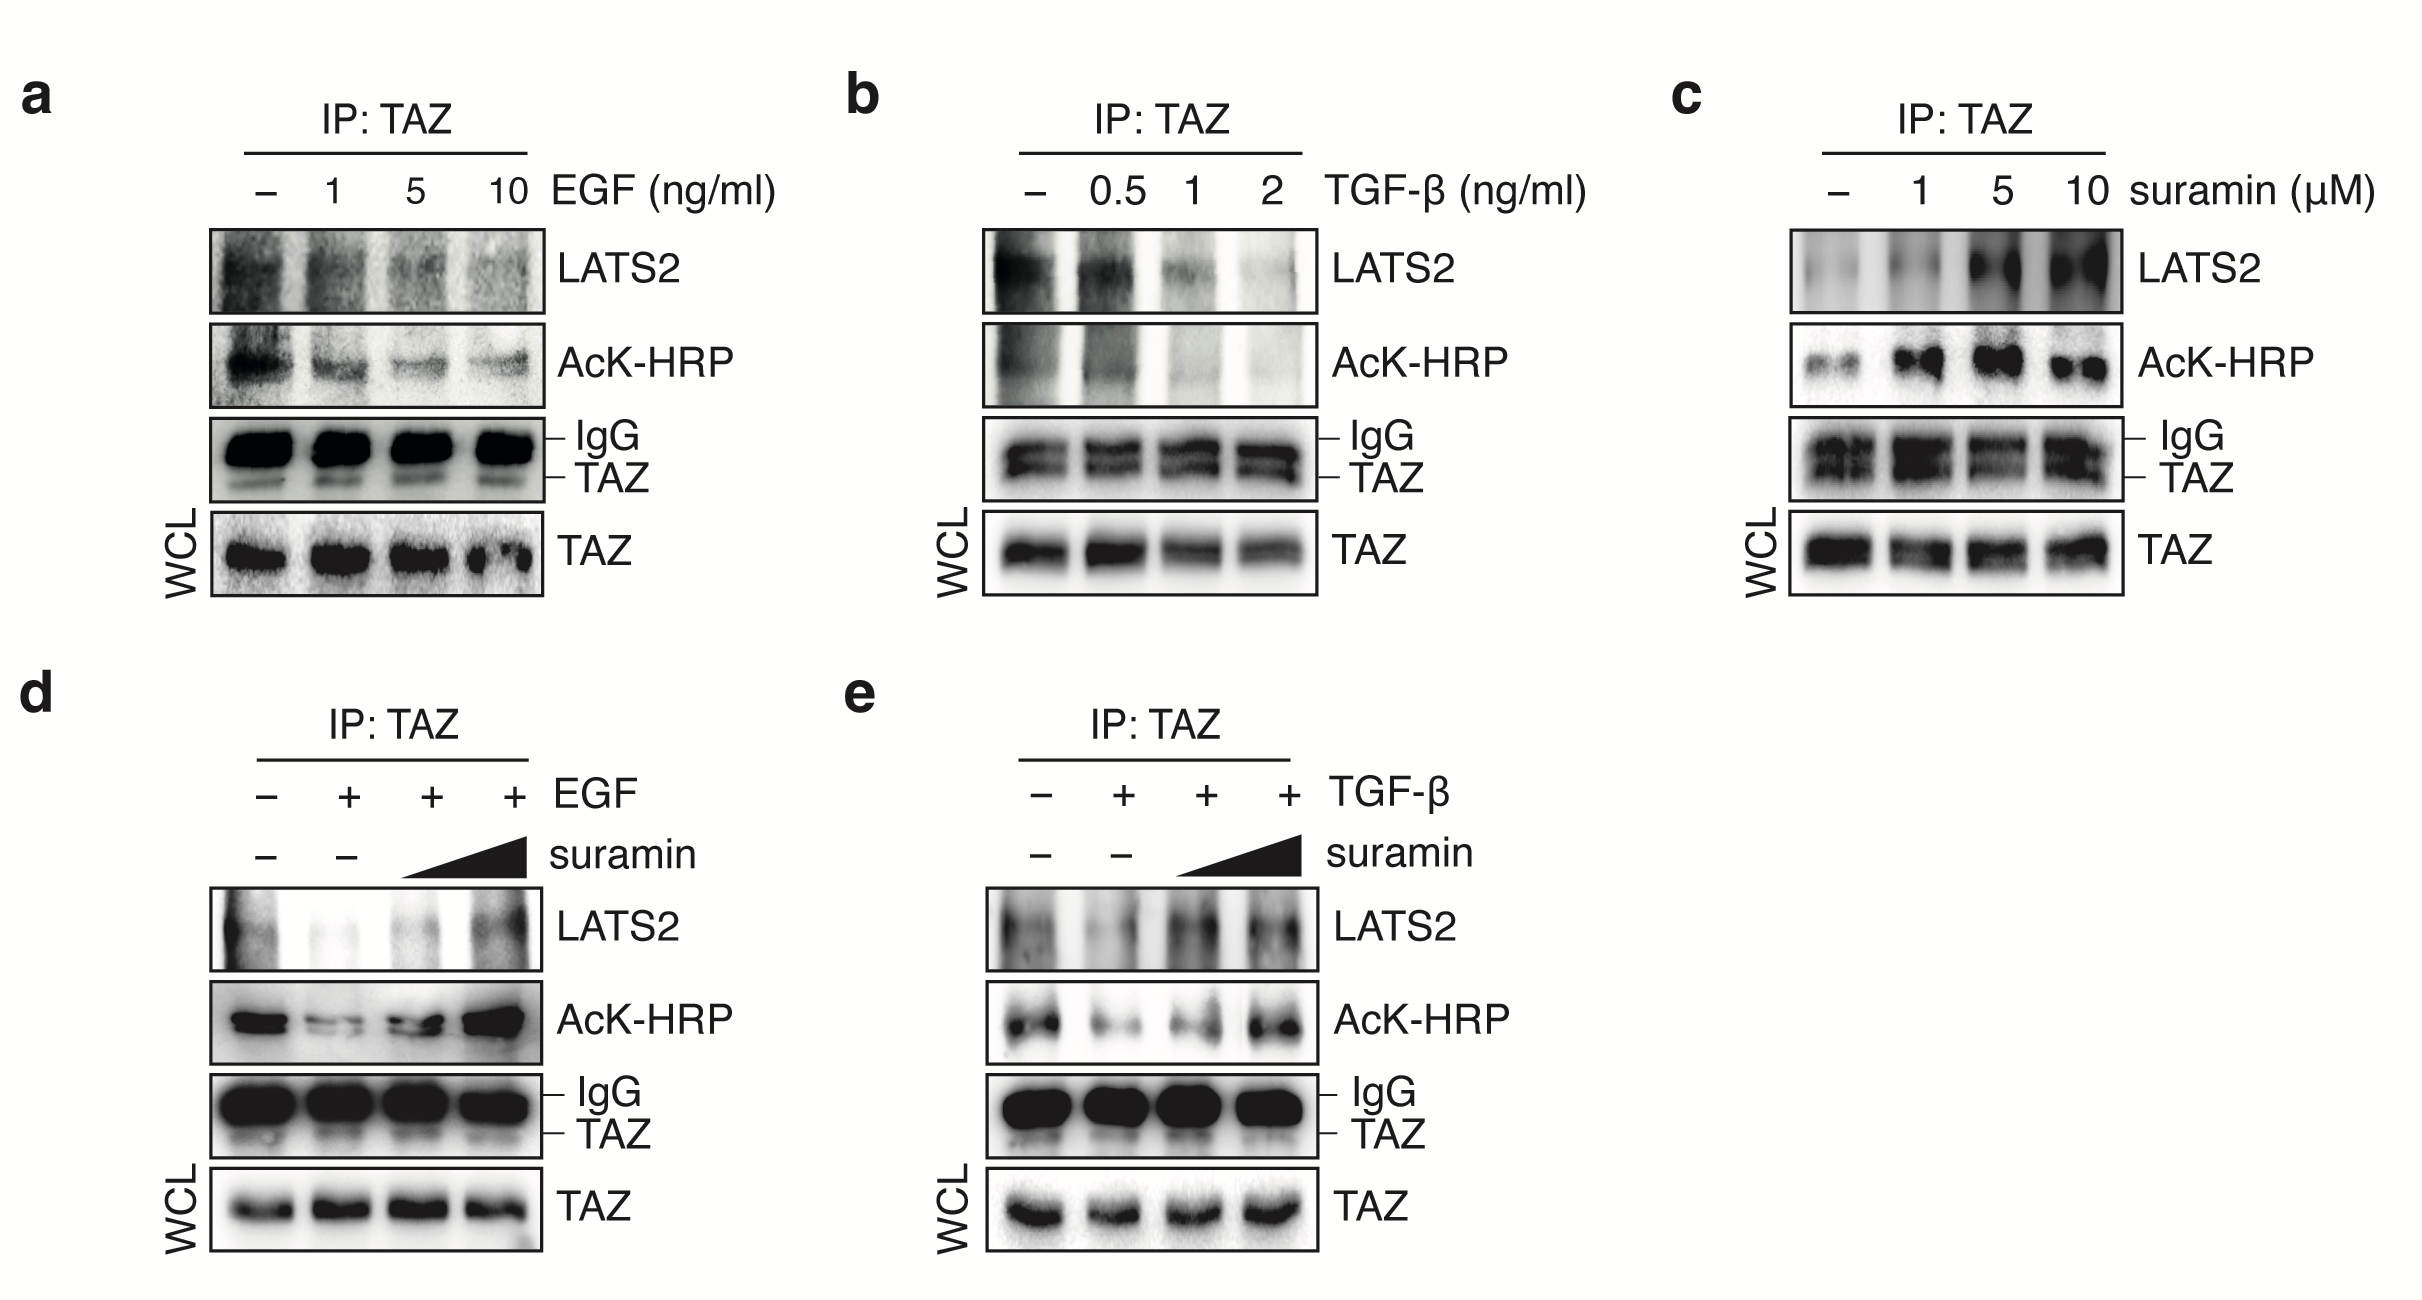
**

**Fig. S1. TAZ K54 deacetylation by SIRT5 reduces its interactions with LATS2.**

(a, b) EGF or TGF-β inhibits LATS2-TAZ interaction. A375 cells were serum-starved for 24 h and treated with EGF (a) or TGF-β (b) for 24 h in a dose-dependent manner. Cell lysates were subjected to immunoprecipitation with anti-TAZ antibody, followed by immunoblotting with anti-LATS2 or anti-AcK-HRP antibodies, respectively.

(c) Suramin increases LATS2-TAZ interaction. A375 cells were serum-starved for 24 h and treated with suramin for 24 h in a dose-dependent manner. Cell lysates were subjected to immunoprecipitation with anti-TAZ antibody, followed by immunoblotting with anti-LATS2 or anti-AcK-HRP antibodies, respectively.

(d, e) Suramin restores the inhibition of LATS2-TAZ interaction by EGF or TGF-β. A375 cells were serum-starved for 24 h, treated with 10 ng/ml EGF (d) or 2 ng/ml TGF-β (e) for 24 h, followed by treatment of suramin for 24 h in a dose-dependent manner. Cell lysates were subjected to immunoprecipitation with anti-TAZ antibody, followed by immunoblotting with anti-LATS2 or anti-AcK-HRP antibodies, respectively.


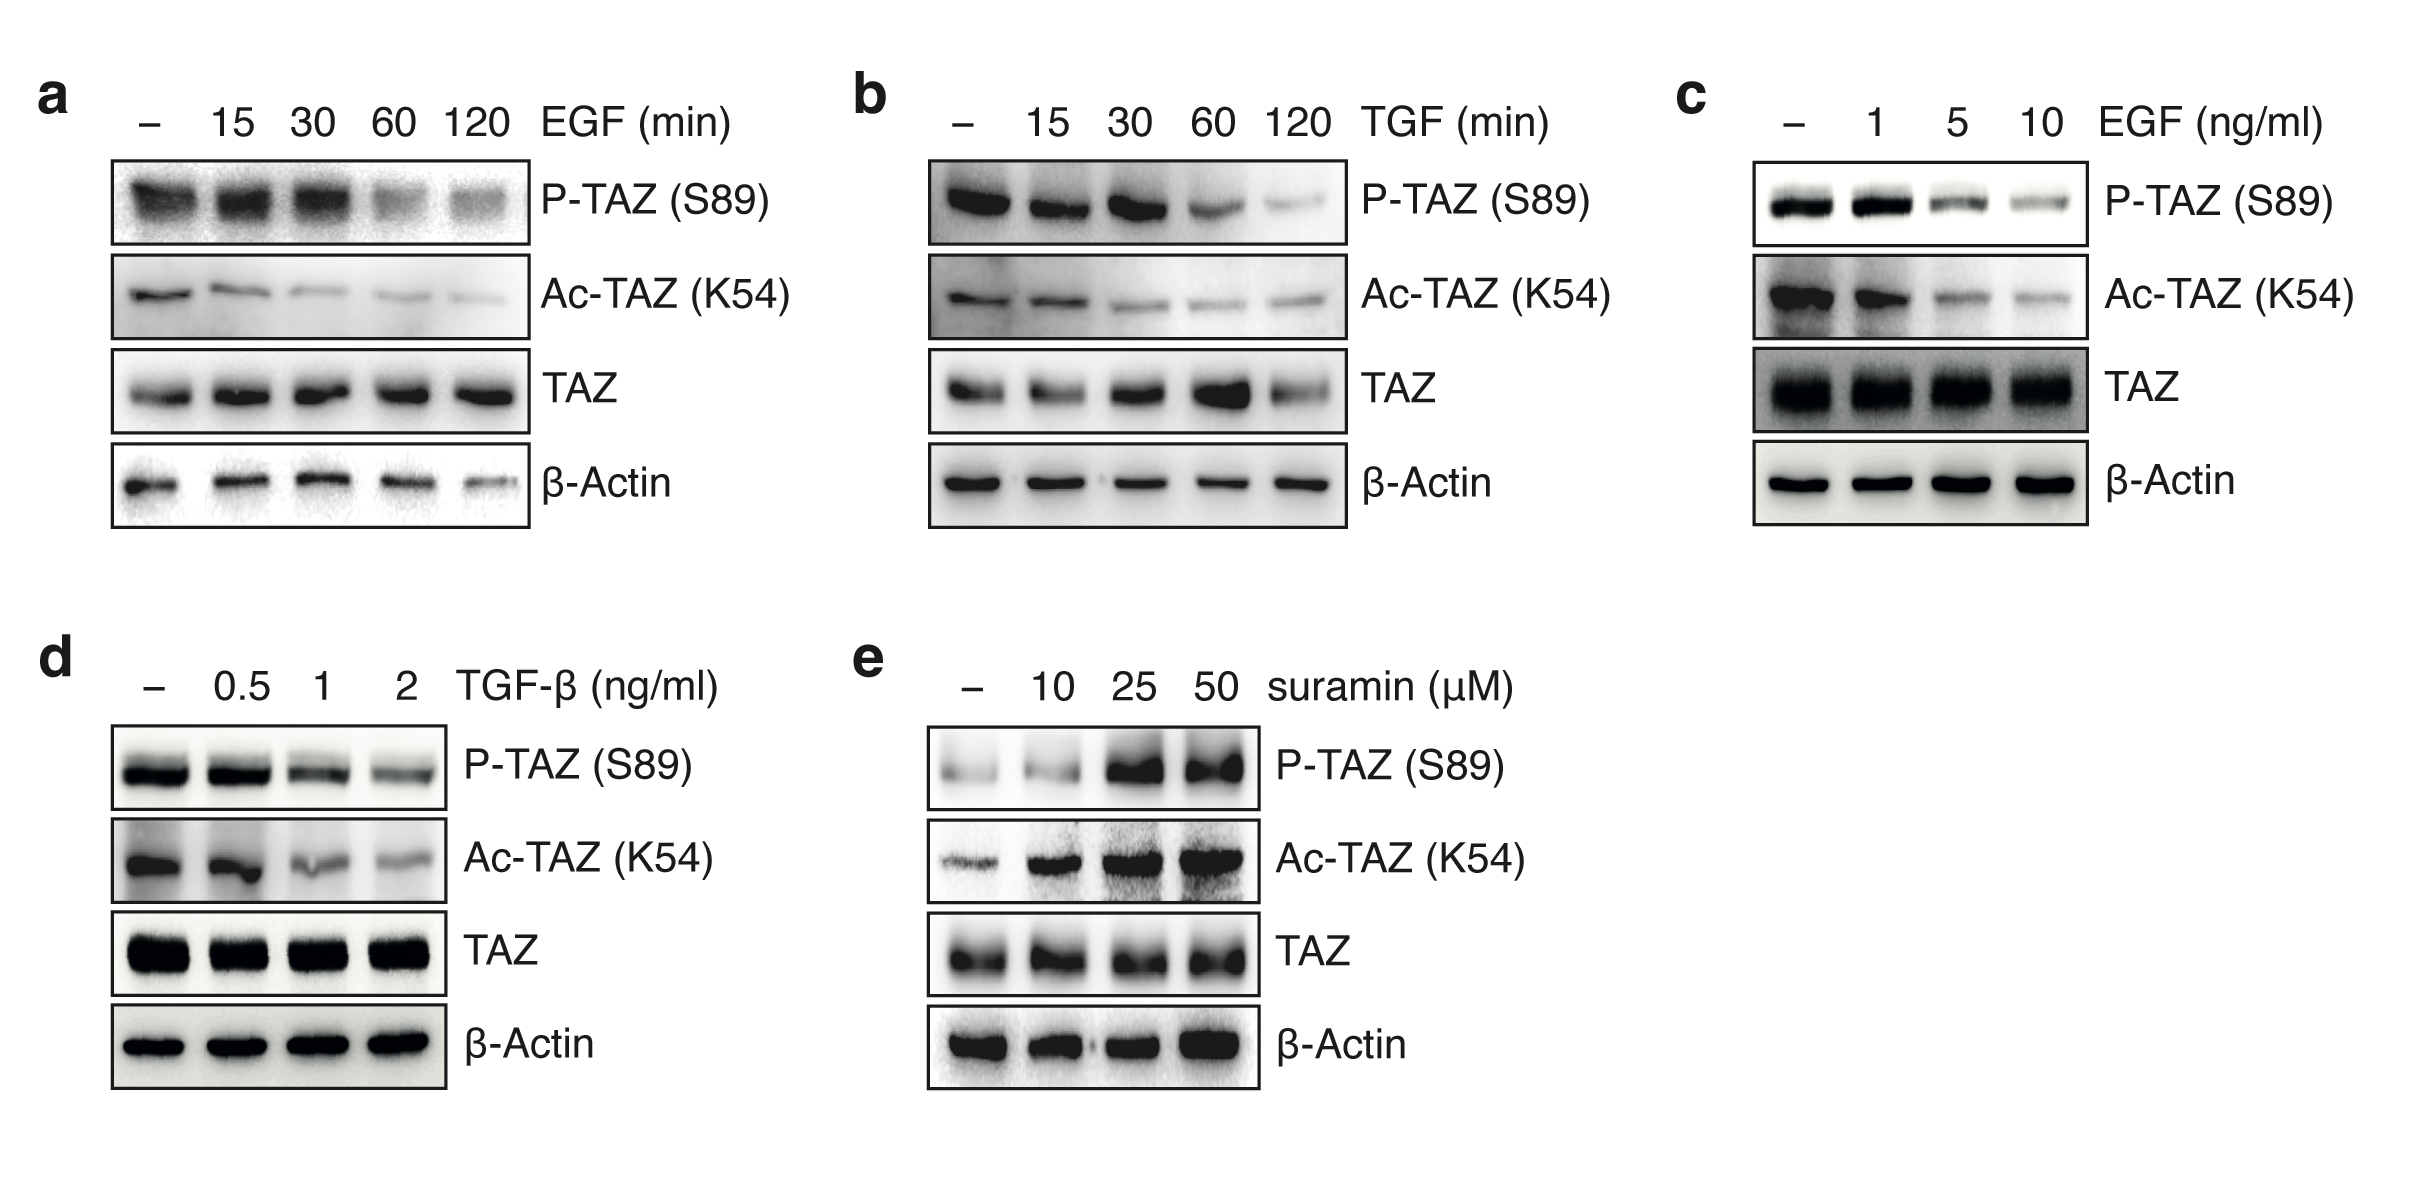


**Fig. S2. Deacetylation of TAZ by SIRT5 inhibits TAZ phosphorylation**

(a-d) EGF or TGF-β facilitates TAZ K54 deacetylation, followed by its reduced S89 phosphorylation. A375 cells were treated with 10 ng/ml EGF or 2 ng/ml TGF-β in a time-dependent manner (a, b), and indicated dose of EGF or TGF-β for 24 h in a dose-dependent manner (c, d), respectively. Cell lysates were subjected to immunoblotting analysis using the anti-Ac-TAZ (K54) and anti-P-TAZ (S89) antibodies.

(e) Suramin increases TAZ K54 acetylation and S89 phosphorylation. A375 cells were serum-starved for 24 h and treated with suramin for 24 h in a dose-dependent manner. Cell lysates were subjected to immunoblotting analysis using the anti-Ac-TAZ (K54) and anti-P-TAZ (S89) antibodies.

**
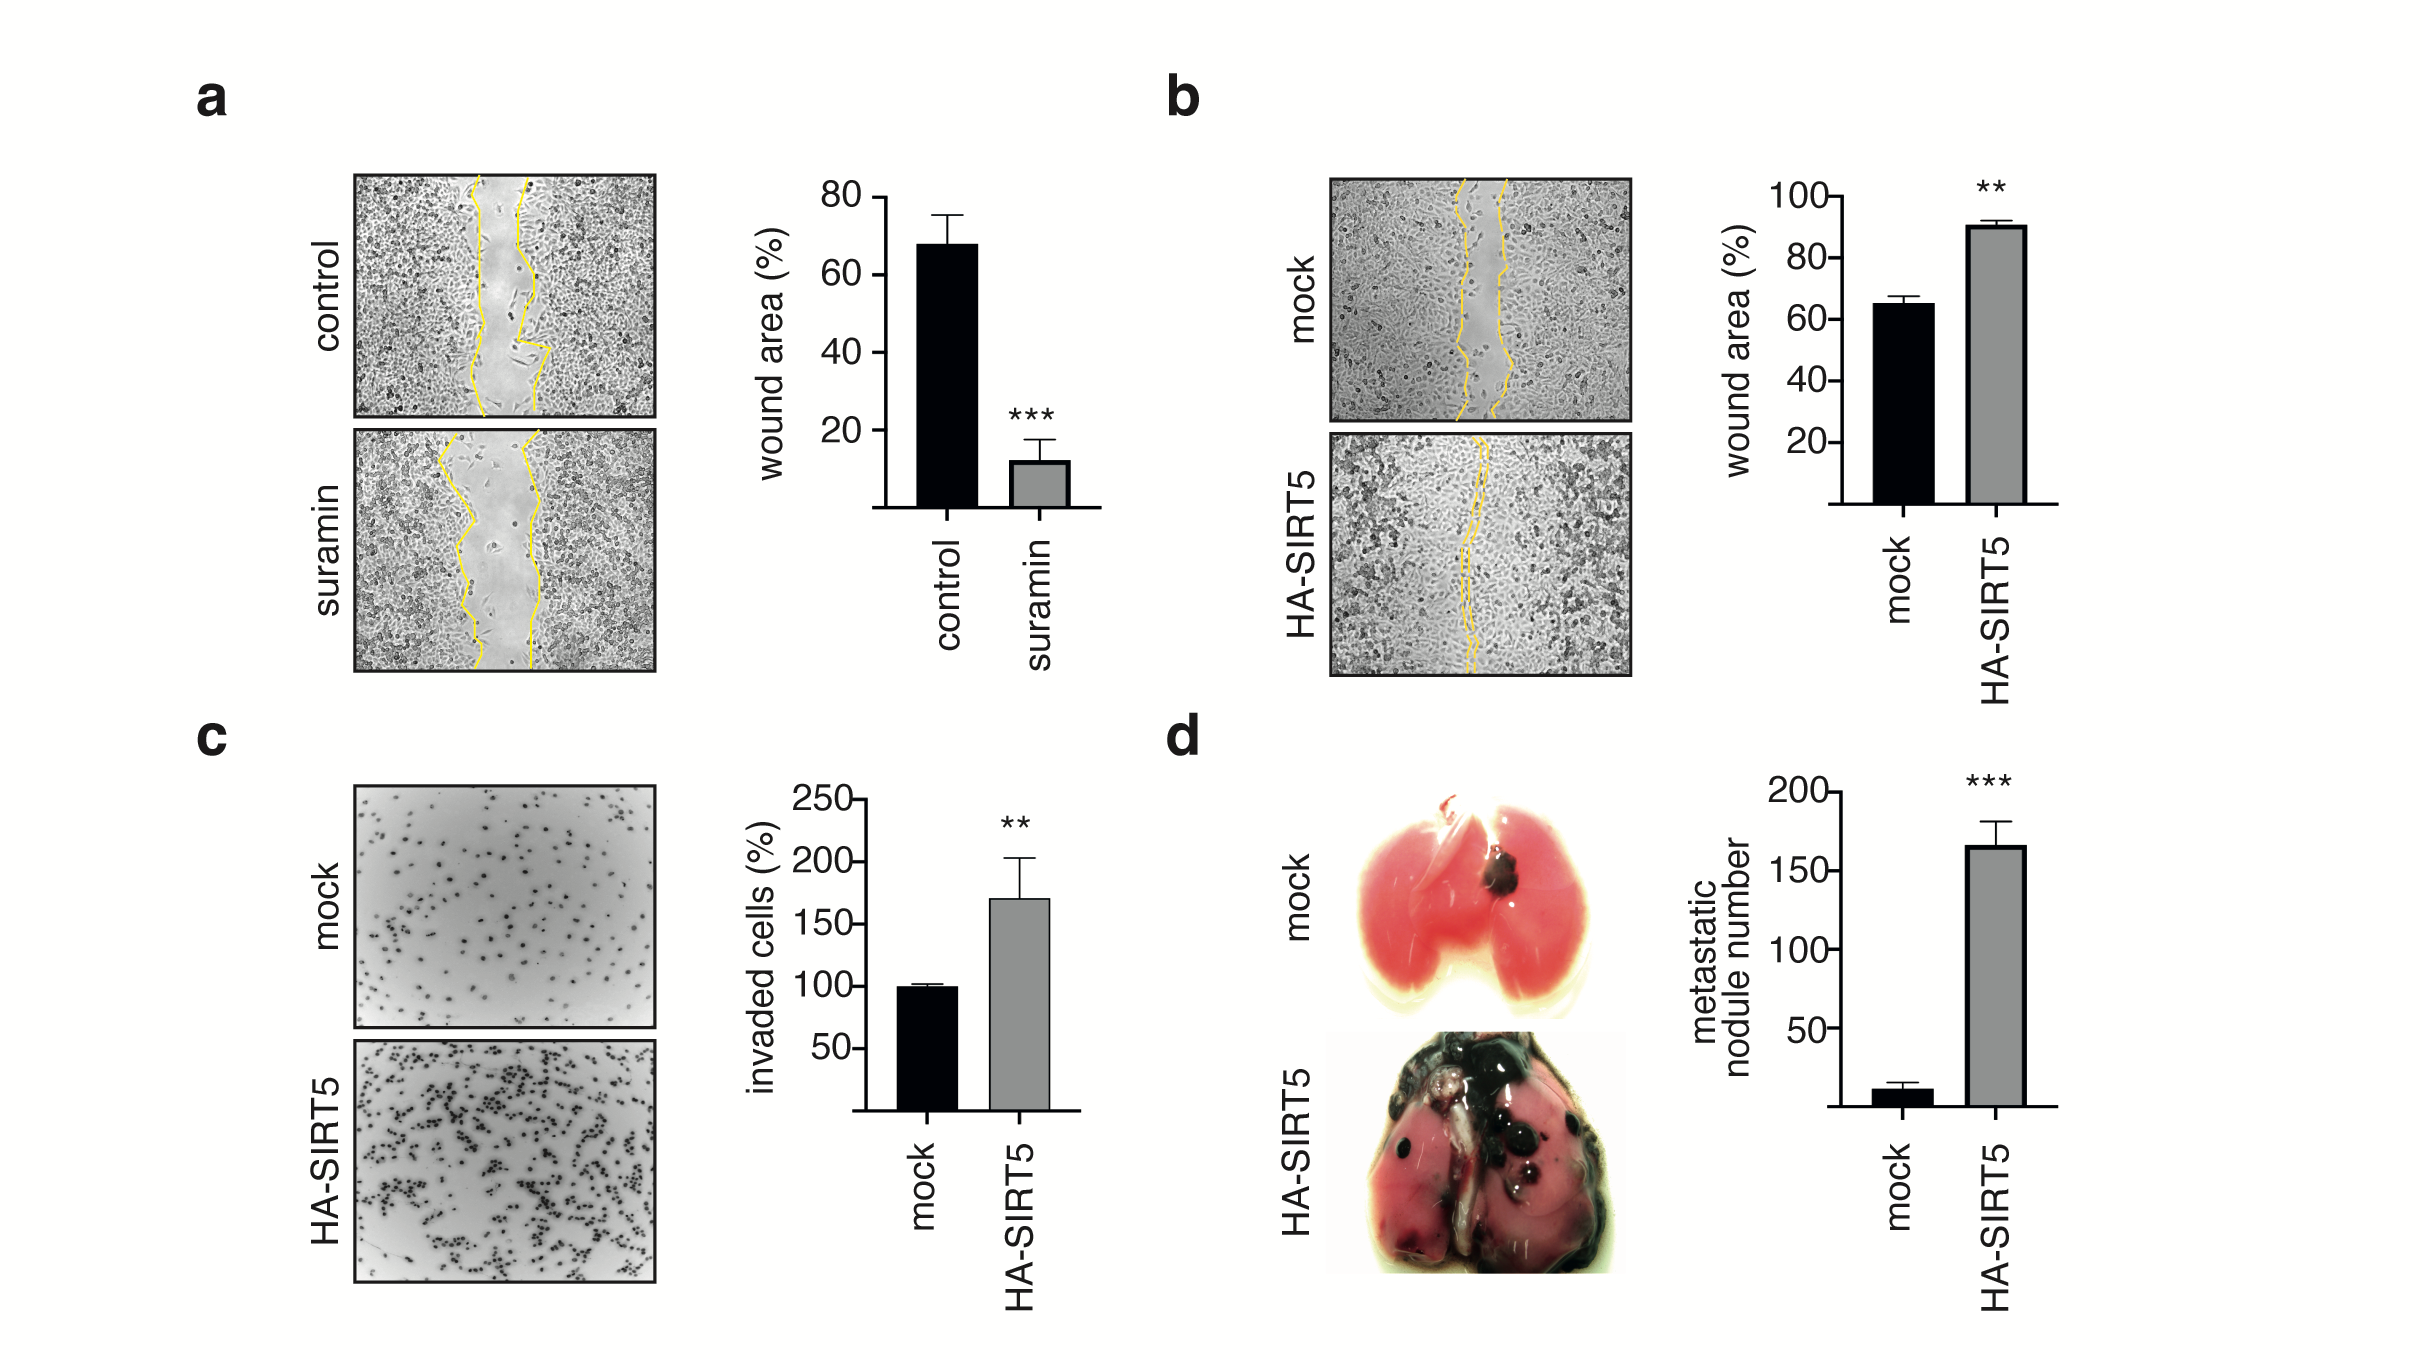
**

**Fig. S3. SIRT5 overexpression induces melanoma development and metastatic potential in vivo.**

(a, b) SIRT5 facilitates melanoma cell migration. A375 cells treated with 25 μM suramin for 24 h (a) or stably expressing mock or HA-SIRT5 (b) were subjected to wound healing assays and images were taken at 24 h (left), respectively. Semi-quantitative analysis of wound closure (right). Relative wound closure was determined by measuring the width of the wounds. Data are presented as means ± SDs, n = 3. ***P* < 0.01, ****P* < 0.001 as compared with control or mock groups.

(c) SIRT5 facilitates melanoma cell invasion. Invasiveness of A375 cells stably expressing mock or HA-SIRT5 were determined using the Transwell assay, respectively. The number of cells that invaded through the Matrigel was counted in ten fields under the ×20 objective lens. Data are presented as means ± SDs, n = 3. ***P* < 0.01 as compared with mock groups.

(d) SIRT5 overexpression promotes lung metastasis of melanoma cells in mice. C57BL/6 mice were injected through the tail vein with 5 × 105 B16-F10-mock or B16-F10-HA-SIRT5 cells. Lungs were removed from the mice at 3 weeks after inoculation. Representative images of lung tissues are shown (left). Number of metastatic lesions in the lung (n= 6). ****P* < 0.001 as compared with mock group.
